# Supplementary material
Source: PubMed Central journal article supplement (PMC4293080)

# Supplementary Figure 1

## Control

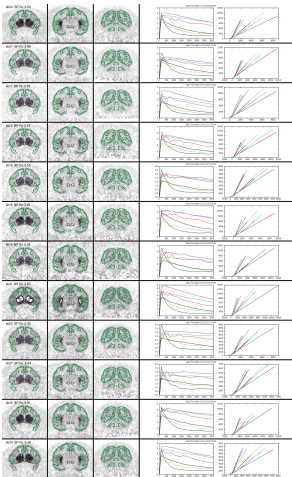

## Alcohol

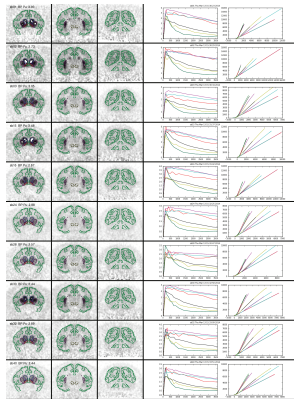

## Stress

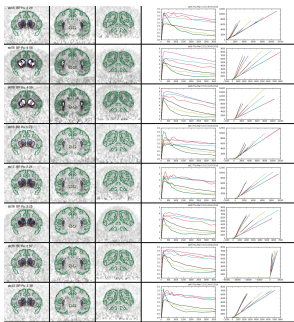

## Alcohol + Stress

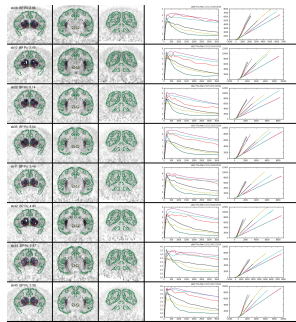

Supplement: NIHMS629526-supplement-Supp_FigureS1.pdf [file NIHMS629526-supplement-Supp_FigureS1.pdf]

Supplementary Figure 2

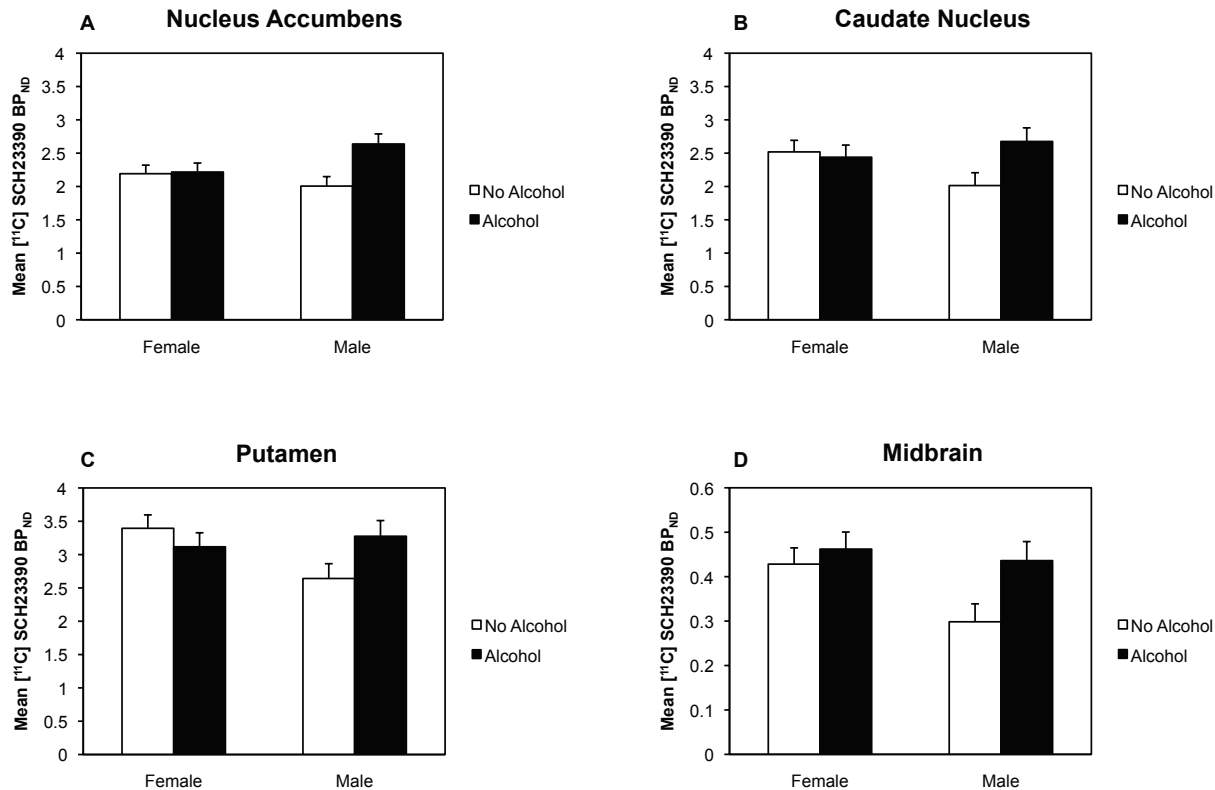

Supplement: NIHMS629526-supplement-Supp_FigureS2.pdf [file NIHMS629526-supplement-Supp_FigureS2.pdf]
